# Supplementary material
Source: ML conference proceedings conference paper supplement (https://openreview.net/forum?id=KNke6Pkq4o)

Marching

Doing jumping jacks

Crawling

MotionLCM

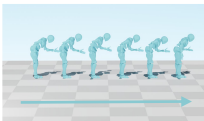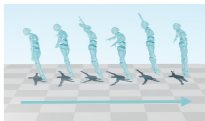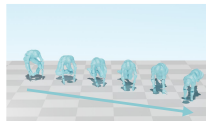

T2M-GPT

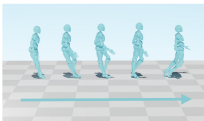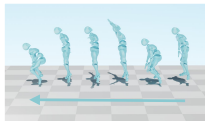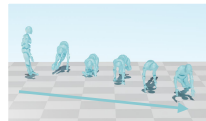

MoMask

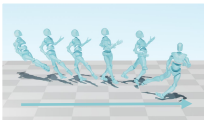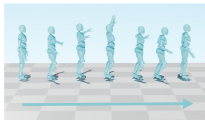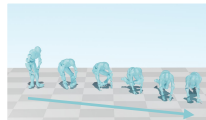

GenMotion  
(ours)

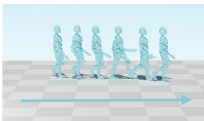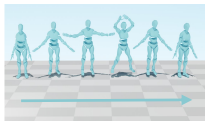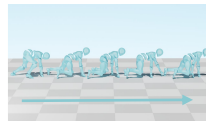

Supplement: supplementary_material [file Supplementary Material 1_Qualitative comparison on MBench prompts.pdf › ViMoGen_Sup_v2/Supplementary Material 1_Qualitative comparison on MBench prompts.pdf]
